# Supplementary material
Source: publisher figshare collection journal article supplement (https://acs.figshare.com/ndownloader/files/24675160)
Supplement: Supplementary file 1 [file 24675160]

## Supplementary Information

# Aluminum oxide nanoparticle films deposited from a nonthermal plasma: synthesis, characterization, and crystallization

Zhaohan Li,<sup>‡</sup> Parker R. Wray,<sup>‡</sup> Magel P. Su,<sup>‡</sup> Qiaomiao Tu,<sup>‡</sup> Himashi P. Andaraarachchi,<sup>‡</sup> Yong Jin Jeong,<sup>‡,1</sup> Harry A. Atwater,<sup>‡</sup> Uwe R. Kortshagen<sup>\*‡</sup>

<sup>‡</sup>*Department of Mechanical Engineering, University of Minnesota, 111 Church St. SE, Minneapolis, Minnesota 55455, United States*

<sup>‡</sup>*California Institute of Technology, Thomas J. Watson Laboratories of Applied Physics, MS 128-95, Pasadena, California 91125 United States*

<sup>\*</sup>*Corresponding author. Email: [kortshagen@umn.edu](mailto:kortshagen@umn.edu)*

---

<sup>1</sup> *Current address: Department of Materials Science & Engineering, Korea National University of Transportation, 50 Daehak-ro, Daesowon-myeon, Chungju, 27469, Republic of Korea*

## Supplementary Figures

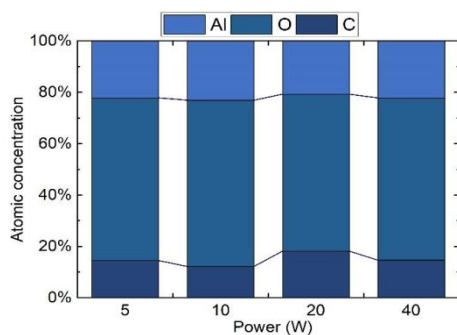

**Figure S1.** Atomic concentration in samples from type B reactor obtained by XPS with power varying from 5 W to 40 W.

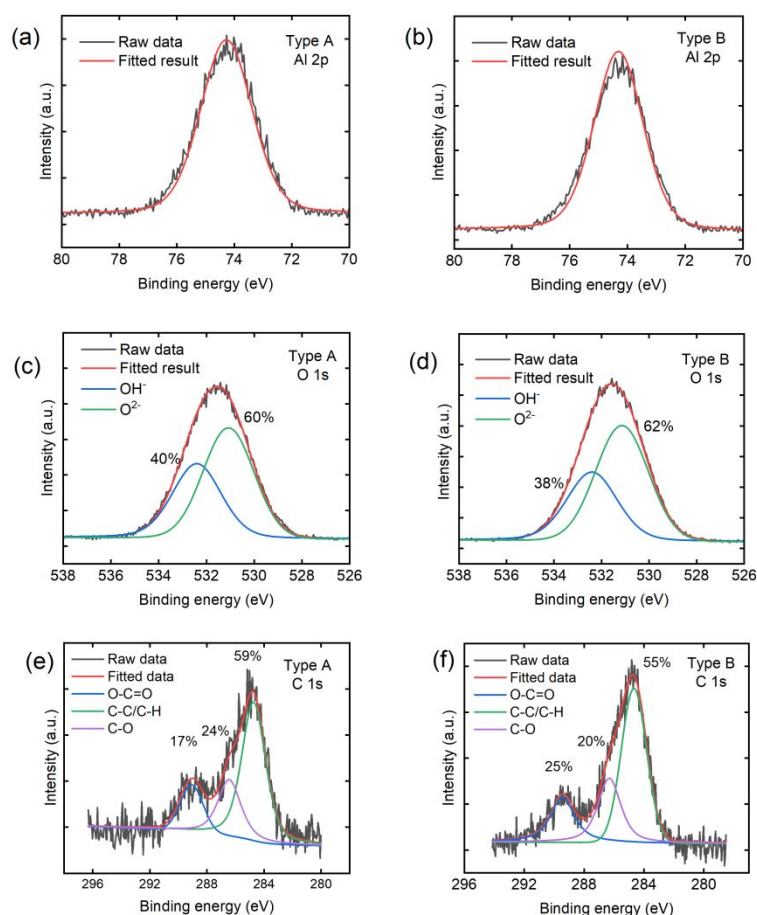

**Figure S2.** XPS high resolution spectra of Al 2p peak (a,b), O 1s peak (c,d) and C 1s peak (e,f) for AlO<sub>x</sub> nanoparticle samples from type A and type B reactors. The peak corresponding to adventitious carbon is shifted to 284.8 eV as a reference.

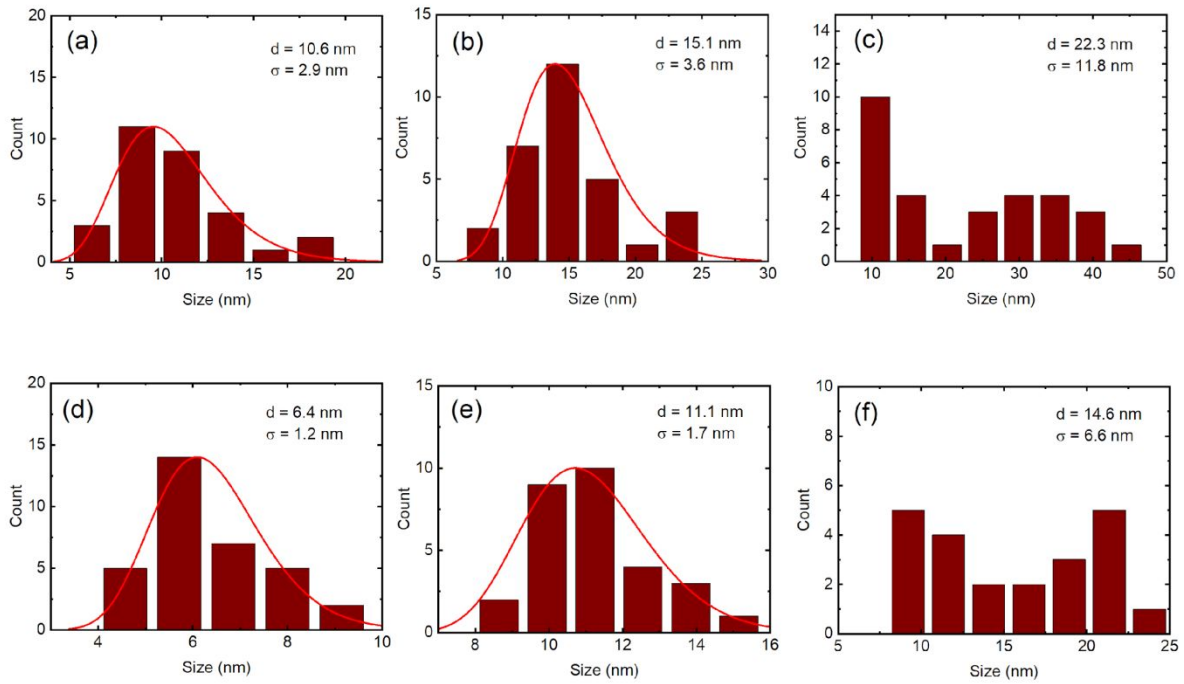

**Figure S3.** (a)–(f) Size distributions corresponding to the TEM images in Figures 3 (a) to (f).

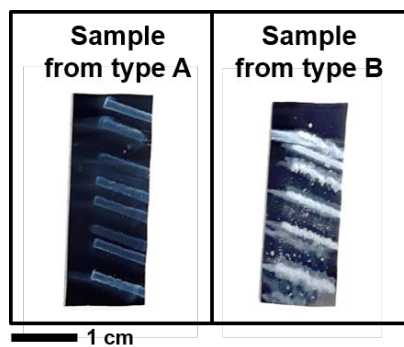

**Figure S4.** Photograph showing AlO<sub>x</sub> nanoparticles deposited from type A and type B reactors for same period of time.

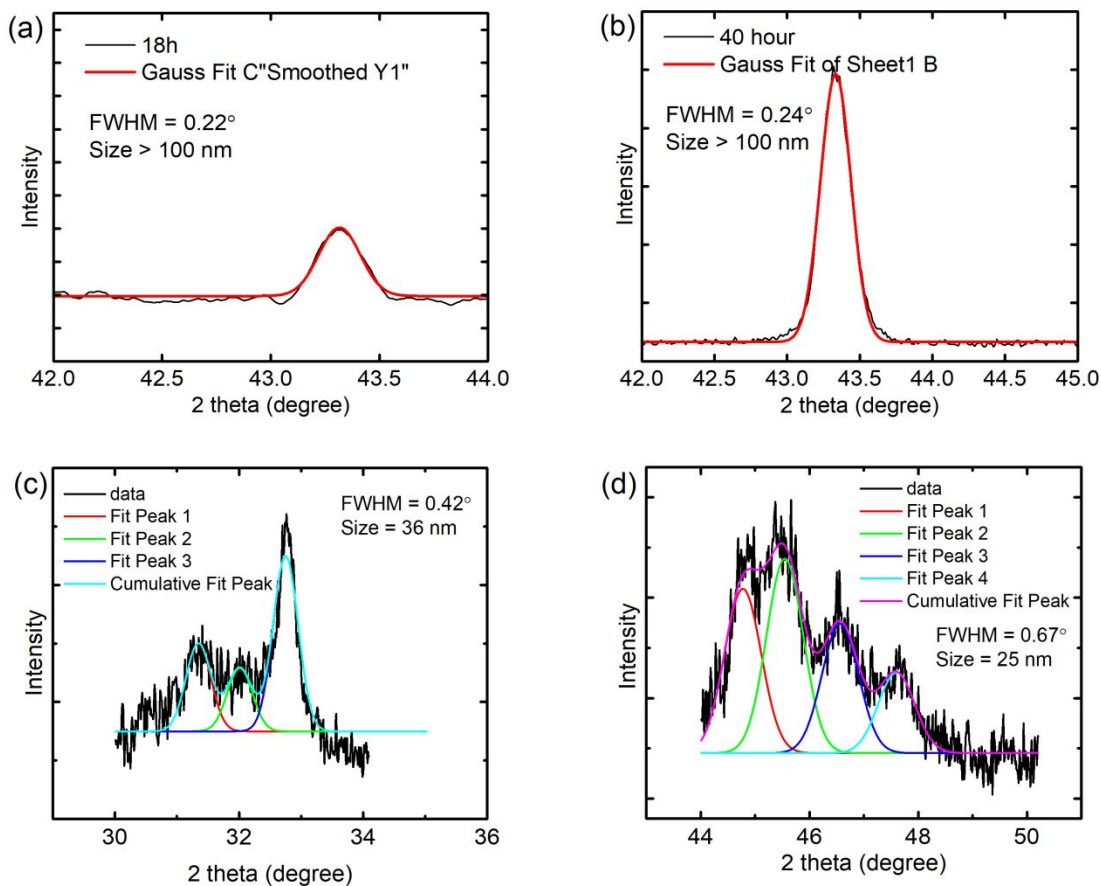

**Figure S5.** Scherrer fittings of XRD patterns ( $\lambda = 1.54 \text{ \AA}$ ) of  $\text{AlO}_x$  nanoparticles from type B reactor after heating at  $1100 \text{ }^\circ\text{C}$  for 18 h and for 40 h. To obtain size estimates for the  $\alpha$ -phase and  $\theta$ -phase individually, we choose non-overlapping peaks from the two phases. For the  $\alpha$ -phase, (113) peaks were fitted (a,b). For  $\theta$ -phase, peaks around  $30\text{-}34^\circ$  (c) and  $44\text{-}50^\circ$  (d) were fitted. Instrumental broadening was accounted for by subtracting the FWHM of the nearest peak of the  $\text{LaB}_6$  standard sample, Figure S1. In the Scherrer equation, a shape factor of 0.89 was used. As the widths of  $\alpha$ -phase peaks are close to those of the  $\text{LaB}_6$  standard sample indicating large crystallite sizes, a rough size estimate of  $>100 \text{ nm}$  is quoted in the main text.

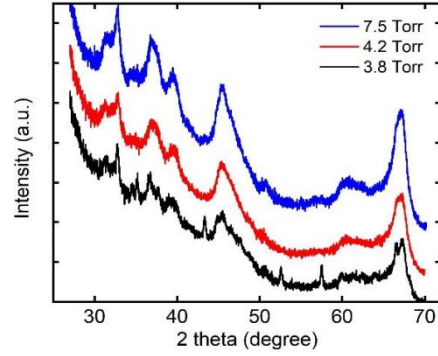

**Figure S6.** XRD patterns of samples from type B reactor for three nanoparticle sizes, obtained by varying the gas pressure, after annealing at 1100°C for 18 hours. Only the smallest particles with about 6 nm size show the appearance of the  $\alpha$ -phase.

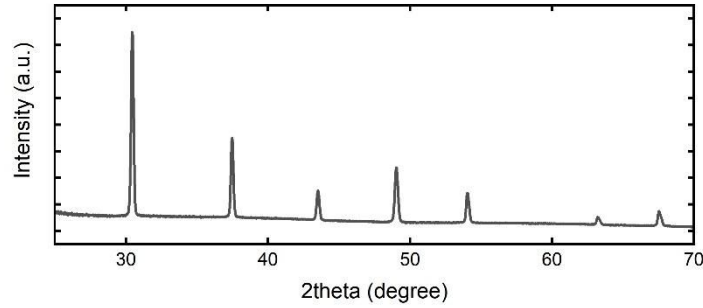

**Figure S7.** XRD pattern from a standard LaB<sub>6</sub> sample taken using a Bruker D8 Discover 2D X-ray diffractometer. This pattern is used as a reference to correct for instrument broadening.

### Permittivity modeling of amorphous aluminum oxide nanoparticle films

The film's homogenized permittivity ( $\epsilon_{eff}$ ) can be represented by a wavelength dependent scalar. We model  $\epsilon_{eff}$  using the Bruggeman mixing formula

$$f_{AlO_x} \frac{\epsilon_{AlO_x} - \epsilon_{eff}}{\epsilon_{eff} + k(\epsilon_{AlO_x} - \epsilon_{eff})} + (1 - f_{AlO_x}) \frac{\epsilon_{air} - \epsilon_{eff}}{\epsilon_{eff} + k(\epsilon_{air} - \epsilon_{eff})} = 0 \#(1)$$

where  $\epsilon_{AlO_x}$  and  $\epsilon_{air}$  are the permittivity of the nanoparticles and air, respectively;  $f_{AlO_x}$  ( $= 22.3 \pm 0.33\%$  for type A and  $19.4 \pm 0.11\%$  for type B) volume fill fraction of the AlO<sub>x</sub>

nanoparticles; and  $k$  ( $= 0.261 \pm 0.005$  for type A and  $0.407 \pm 0.006$  for type B) is the depolarizing factor 1.  $\epsilon_{AlO_x}$  is modeled as

$$\frac{\epsilon_{AlO_x}(E)}{\epsilon_o} = \epsilon_\infty + \epsilon_{pole1} + \epsilon_{pole2} + \sum_{n=1}^{11} \epsilon_{Gauss_n}(E) \#(2)$$

Where  $\epsilon_o$  is the permittivity of free space and  $\epsilon_\infty$  ( $= 3.09 \pm 0.01$  for type A and  $2.97 \pm 0.02$  for type B) is the infinite frequency permittivity. The complex part of the Gaussian oscillators ( $\epsilon_{Gauss_n} = \epsilon_{1n}(E) + i\epsilon_{2n}(E)$ ) are given by

$$\epsilon_{2n}(E) = A_n e^{-\left(\frac{E-E_n}{\sigma_n}\right)^2} - A_n e^{-\left(\frac{E+E_n}{\sigma_n}\right)^2}, \sigma_n = \frac{Br_n}{2\sqrt{\ln(2)}} \#(3)$$

where  $Br_n$  is the full-width at half-maximum, which accounts for spectral broadening. The real part of the permittivity is given by the Kramers-Kronig relation

$$\epsilon_{1n}(E) = \frac{2}{\pi} P \int_0^\infty \frac{\xi \epsilon_{2n}(\xi)}{\xi^2 - E^2} d\xi \#(4)$$

where P is the principle value. Table 1 and Table 2 give the fit parameters of the Gaussian oscillators for the amorphous  $Al_2O_3$  nanoparticle films from type A and type B reactors, respectively.

| Type A                                              | Gaussian Oscillator Fit |                                   |                                  | Literature Values                |           |
|-----------------------------------------------------|-------------------------|-----------------------------------|----------------------------------|----------------------------------|-----------|
|                                                     | Amplitude               | Broadening<br>[cm <sup>-1</sup> ] | Frequency<br>[cm <sup>-1</sup> ] | Frequency<br>[cm <sup>-1</sup> ] | Ref.      |
| AlO <sub>6</sub> , AlO <sub>4</sub><br>Deformations | 1.0340                  | 83.221                            | 344.27                           | 322–326                          | [1][2]    |
| AlO <sub>6</sub><br>stretching                      | 4.6977                  | 408.32                            | 475.78                           | 482–491                          | [1]       |
| AlO <sub>4</sub><br>stretching                      | 0.3357                  | 107.70                            | 851.46                           | 902–880                          | [1][3][4] |
| Al–OH<br>sym/asym                                   | 0.6933                  | 341.47                            | 1027.5                           | 1072–1160                        | [1][5]    |
| H <sub>2</sub> O<br>deformations/<br>vibrations     | 0.22815                 | 92.908                            | 1410.6                           | 1375                             | [1]       |

|                  |         |        |        |           |           |
|------------------|---------|--------|--------|-----------|-----------|
| H-O-H bend       | 0.31668 | 159.19 | 1535.8 | 1600      | [4]       |
| -COO-            | 0.0783  | 74.000 | 1655.8 | 1300-1850 | [2]       |
|                  | 0.05905 | 1700.8 | 2355.7 |           |           |
| Al-OH stretching | 0.19133 | 618.98 | 3207.7 | 3250-3600 | [2][4]    |
| O-H stretching   | 0.20091 | 278.01 | 3429.0 | 3400-3600 | [1][2][5] |
| Al-OH stretching | 0.0719  | 162.00 | 3523.7 | 3250-3600 | [2][4]    |

**Table 1.** Gaussian oscillator parameters used to reconstruct the permittivity of nanoparticles from type A reactor. Phonon resonance type (first column), amplitude (second column), spectral broadening (third column) and resonant frequency (fourth column) of the Gaussian oscillators used to calculate the  $\text{AlO}_x$  particle permittivity from Mueller matrix data. The fifth column gives the resonant frequency range expected from previous literature reports. Citations for the expected frequency range are in the sixth column.

| <i>Type B</i>                                   | <i>Gaussian Oscillator Fit</i> |                                               |                                              | <i>Literature Values</i>                     |             |
|-------------------------------------------------|--------------------------------|-----------------------------------------------|----------------------------------------------|----------------------------------------------|-------------|
| <i>Vibration</i>                                | <i>Amplitude</i><br><i>e</i>   | <i>Broadening</i><br><i>[cm<sup>-1</sup>]</i> | <i>Frequency</i><br><i>[cm<sup>-1</sup>]</i> | <i>Frequency</i><br><i>[cm<sup>-1</sup>]</i> | <i>Ref.</i> |
| $\text{AlO}_6$ , $\text{AlO}_4$<br>Deformations | 2.5049                         | 109.52                                        | 318.72                                       | 322-326                                      | [1][2]      |
| $\text{AlO}_6$<br>stretching                    | 4.0194                         | 320.53                                        | 531.22                                       | 482-491                                      | [1]         |
| $\text{AlO}_4$<br>stretching                    | 0.4802                         | 100.47                                        | 837.05                                       | 902-880                                      | [1][3][4]   |
| Al-OH<br>sym/asym                               | 0.78315                        | 397.17                                        | 966.53                                       | 1072-1160                                    | [1][5]      |

|                                              |         |        |        |           |           |
|----------------------------------------------|---------|--------|--------|-----------|-----------|
| H <sub>2</sub> O deformations/<br>vibrations | 0.26118 | 98.502 | 1403.0 | 1375      | [1]       |
| H–O–H bend                                   | 0.37889 | 140.14 | 1520.6 | 1600      | [4]       |
| –COO–                                        | 0.0780  | 74.000 | 1635.8 | 1300–1850 | [2]       |
|                                              | 0.0759  | 1883.7 | 2237.9 |           |           |
| Al–OH stretching                             | 0.1738  | 559.78 | 3129.3 | 3250–3600 | [2][4]    |
| O–H stretching                               | 0.3324  | 304.69 | 3406.2 | 3400–3600 | [1][2][5] |
| Al–OH stretching                             | 0.1019  | 162.53 | 3607.7 | 3250–3600 | [2][4]    |

**Table 2.** Gaussian oscillator parameters used to reconstruct the permittivity of nanoparticles from type B reactor. Phonon resonance type (first column), amplitude (second column), spectral broadening (third column) and resonant frequency (fourth column) of the Gaussian oscillators used to calculate the AlO<sub>x</sub> particle permittivity from Mueller matrix data. The fifth column gives the resonant frequency range expected from previous literature reports. Citations for the expected frequency range are in the sixth column.

## References

- (1) Boumaza, A.; Favaro, L.; Lédion, J.; Sattonay, G.; Brubach, J.; Berthet, P.; Huntz, A.; Roy, P.; Tétot, R. Transition alumina phases induced by heat treatment of boehmite: an X-ray diffraction and infrared spectroscopy study. *J. Solid State Chem.* **2009**, *182*, 1171–1176.
- (2) Catherine, Y.; Talebian, A. Plasma deposition of aluminum oxide films. *J. Electron. Mater.* **1988**, *17*, 127–134.
- (3) Zagrajczuk, B.; Dziadek, M.; Olejniczak, Z.; Sulikowski, B.; Cholewa-Kowalska, K.; Laczka, M. Structural investigation of gel-derived materials from the SiO<sub>2</sub>–Al<sub>2</sub>O<sub>3</sub> system. *J. Mol. Struct.* **2018**, *1167*, 23–32.



- (4) Wäckelgård, E. The experimental dielectric function of porous anodic alumina in the infrared region; a comparison with the Maxwell-Garnett model. *J. Phys.: Condens. Matter* **1996**, *8*, 4289.
- (5) Liu, C.; Shih, K.; Gao, Y.; Li, F.; Wei, L. Dechlorinating transformation of propachlor through nucleophilic substitution by dithionite on the surface of alumina. *J. Soils Sediments* **2012**, *12*, 724–733.
